# Supplementary material for: Bromination and iodination of diphosphane dichalcogenides
Source: Royal Society of Chemistry journal article supplement (doi:10.1039/c7dt04531j), 2018-01-01
Supplement: c7dt04531j1.pdf [file c7dt04531j1.pdf]

# **Bromination and Iodination of Diphosphane Dichalcogenides**

Daniel Upmann and Peter G. Jones

## **Supplementary Material**

|                                                                    |              |
|--------------------------------------------------------------------|--------------|
| <b>1. Packing of compounds 2, 3, 5, 6, 11, 12, 13, 14</b>          | <b>p. 2</b>  |
| <b>2. X-ray structure determinations of four by-products 16–19</b> | <b>p. 9</b>  |
| <b>3. Four X-ray structures of diphosphane diselenides 20–23</b>   | <b>p. 13</b> |
| <b>References</b>                                                  | <b>p. 17</b> |

## 1. Packing diagrams of compounds 2, 3, 5, 6, 10, 11, 12, 13, 14

Most of the compound described in the main part of this paper display a number of C—H⋯Hal contacts (especially from the central carbons between the phosphorus atoms). Here, however, we mainly concentrate on halogen⋯halogen contacts and other types of "soft-soft" interaction.

Compound **2** displays two borderline I⋯I contacts, I2⋯I4 3.9123(3) and 3.9377(3) Å, via the operators  $\frac{1}{2}-x, \frac{1}{2}+y, \frac{1}{2}-z$  and  $-\frac{1}{2}+x, \frac{1}{2}-y, \frac{1}{2}+z$  respectively.

For compound **3**, the molecules are connected to form chains parallel to [101] by the contact Se1⋯Br1(1-x, y, 1.5-z) 3.4548(4) Å (Fig. S1).

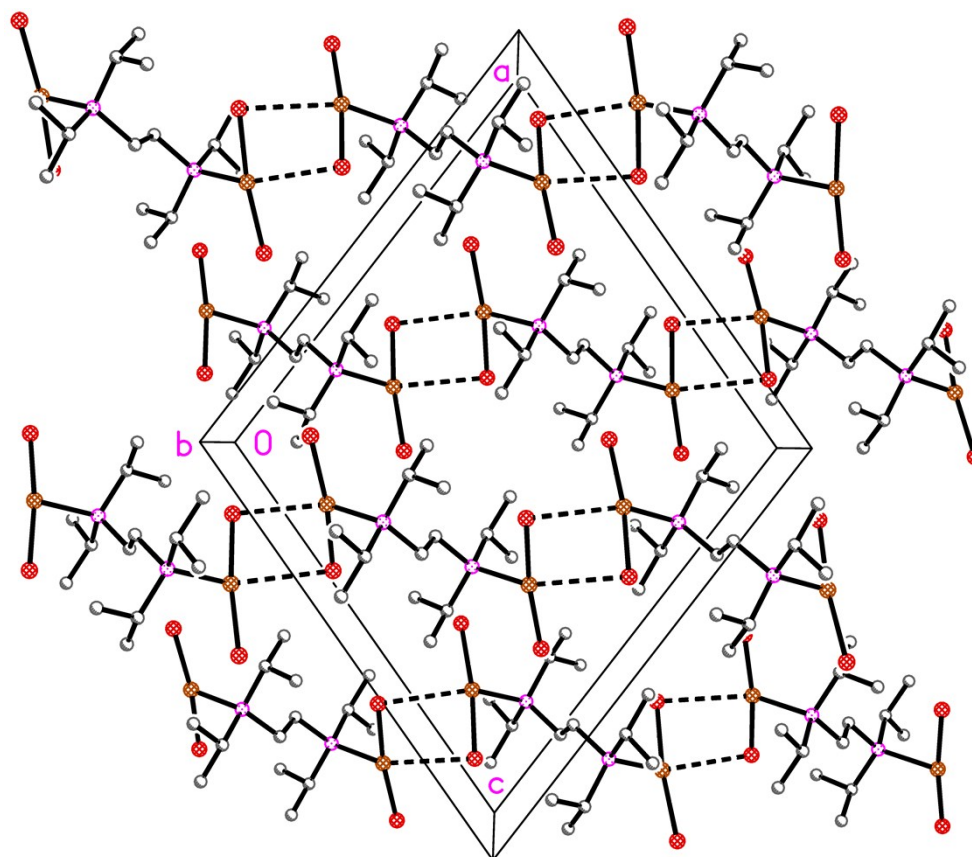

Fig. S1. Packing diagram of compound **3** viewed parallel to the *b* axis. Short Se⋯Br contacts are indicated by dashed lines.

Compound **5** has several Br⋯Br contacts apart from those in the asymmetric unit. A complete list is given in Table S1. Fig. S2 shows part of the layer structure, including all contacts up to 3.87 Å (excluding 1,3-type contacts). The very short contact Br8⋯Br8 can be recognised at the centre of Br<sub>4</sub> rhombuses. The contact Br7⋯Br12 connects adjacent layers in the third dimension.

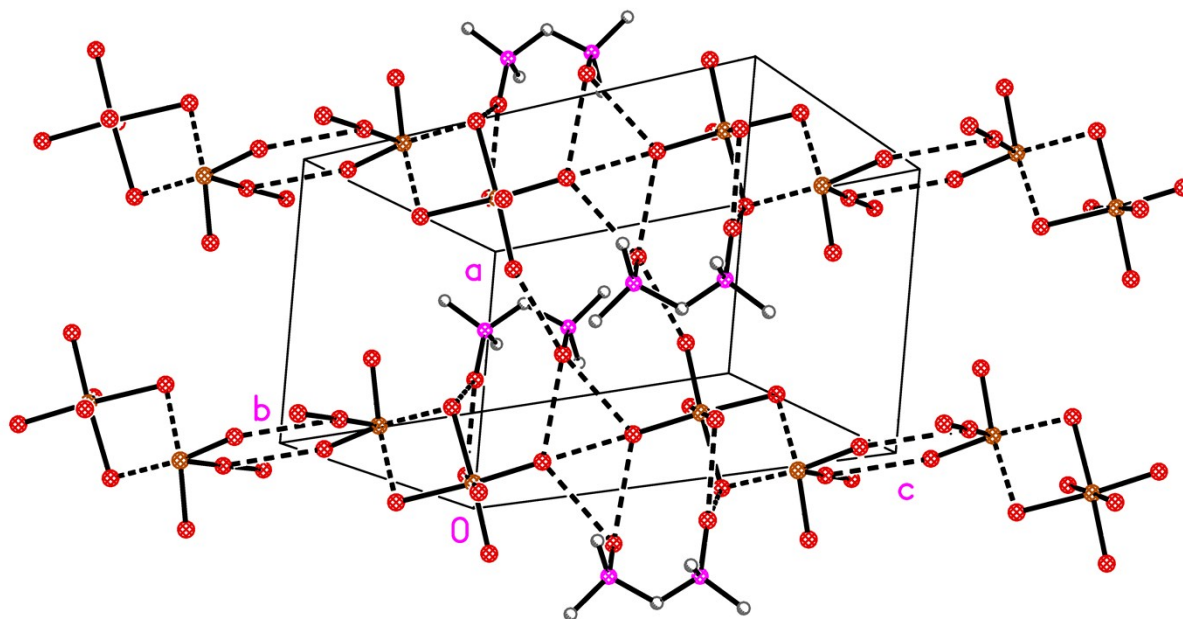

Fig. S2. Packing diagram of compound **5** viewed perpendicular to (011). Short contacts are indicated by dashed lines. Phenyl rings are reduced to the *ipso* carbons for clarity.

Table S1. Br–Br contacts for compound **5**.

| Contact   | Distance (Å) | Operator           |
|-----------|--------------|--------------------|
| Br1–Br3   | 3.5911(7)    |                    |
| Br1–Br7   | 3.3783(8)    |                    |
| Br1–Br9   | 3.9542(7)    |                    |
| Br2–Br8   | 3.8678(8)    |                    |
| Br2–Br6   | 3.5746(8)    | $x-1, y, z$        |
| Br2–Br8   | 3.7302(8)    | $-x+2, -y+1, -z+1$ |
| Br7–Br12  | 3.3410(7)    | $x, y+1, z$        |
| Br8–Br8   | 3.2402(9)    | $-x+2, -y+1, -z+1$ |
| Br10–Br10 | 3.8969(10)   | $-x+2, -y, -z+2$   |
| Br10–Br11 | 3.7065(6)    | $-x+2, -y, -z+2$   |
| Br10–Br12 | 3.9189(7)    | $-x+2, -y, -z+2$   |

Compound **6** also displays several Br–Br and also Se–Br contacts (Table S2). The packing is quite complex, but can be broken down into two sections. The SeBr<sub>4</sub> and tribromide residues combine to form ribbons parallel to the  $x$  axis in the region  $z \approx 0$  (Fig. S3). The residues based on the diphosphine and on Se1 assemble in the region  $z \approx \frac{1}{2}$  (Fig. S4).

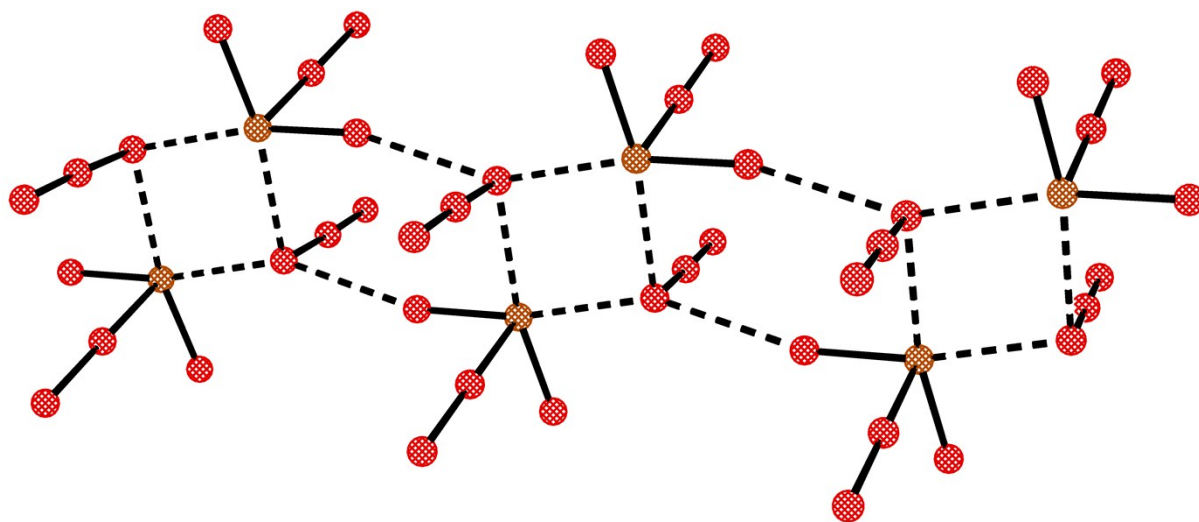

Fig. S3. Packing diagram of compound **6**; ribbon of  $\text{SeBr}_4$  residues and tribromide ions. Short contacts are indicated by dashed lines.

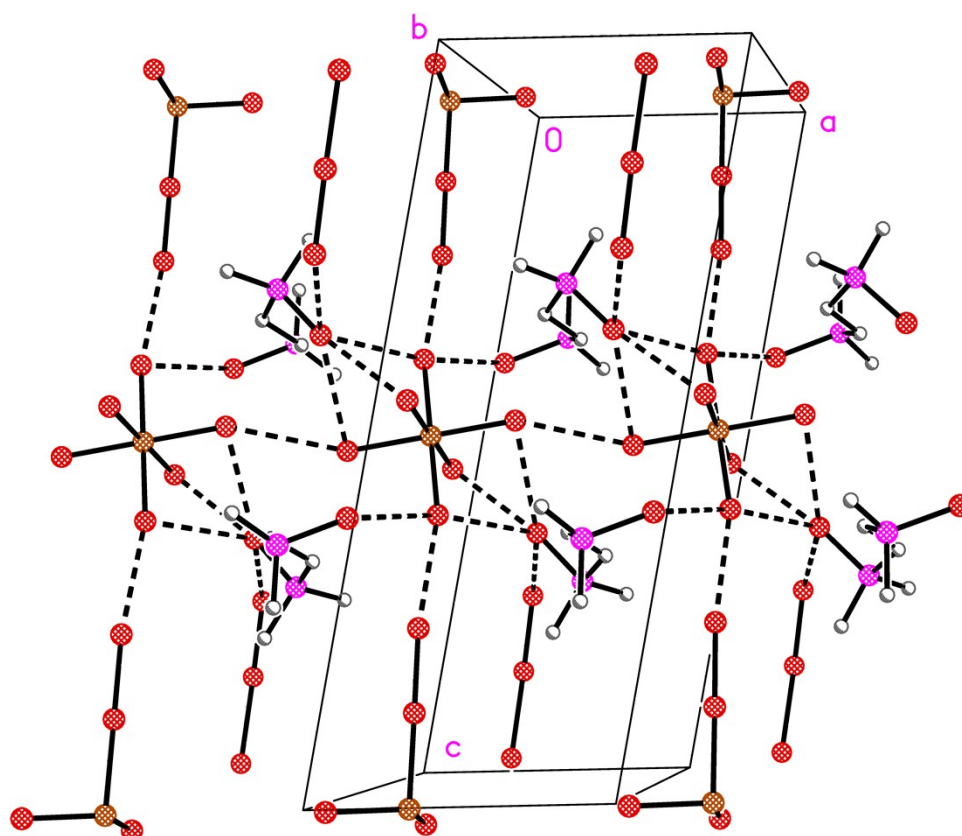

Fig. S4. Packing diagram of compound **6**; ribbon of diphosphine and Se1 residues (parallel to the  $a$  axis in the region  $z \approx \frac{1}{2}$ ) viewed perpendicular to the  $ac$  plane. Some  $\text{SeBr}_4$  and tribromide residues are shown in the regions  $z \approx 0$  and 1. Short contacts are indicated by dashed lines.

Table S2. Br–Br and Se–Br contacts for compound **6**.

| Contact   | Distance (Å) | Operator           |
|-----------|--------------|--------------------|
| Br2–Br3   | 3.3783(7)    |                    |
| Br2–Br4   | 3.8189(6)    |                    |
| Br2–Br5   | 3.8085(6)    |                    |
| Br5–Br12  | 3.4137(7)    |                    |
| Se2–Br6   | 2.9850(7)    |                    |
| Br1–Br5   | 3.8611(7)    | $x+1, y, z$        |
| Br2–Br8   | 3.7394(7)    | $-x+1, -y+1, -z+2$ |
| Br4–Br4   | 3.7063(9)    | $-x+1, -y+1, -z+1$ |
| Br6–Br6   | 3.9438(10)   | $-x+1, -y+2, -z+2$ |
| Br6–Br10  | 3.3520(7)    | $x+1, y, z$        |
| Br6–Se2   | 3.1288(8)    | $-x+1, -y+2, -z+2$ |
| Br7–Br11  | 3.9223(7)    | $-x+1, -y+2, -z+2$ |
| Br10–Br10 | 3.9546(10)   | $-x, -y+2, -z+2$   |

Compound **10** forms broad ribbons parallel to the *ac* plane (Fig. S5). In the centre of the ribbons, the cations form dimers via Se–Br interactions; the tribromide ions are attached at the periphery by hydrogen bonds C–H<sub>methano</sub>–Br.

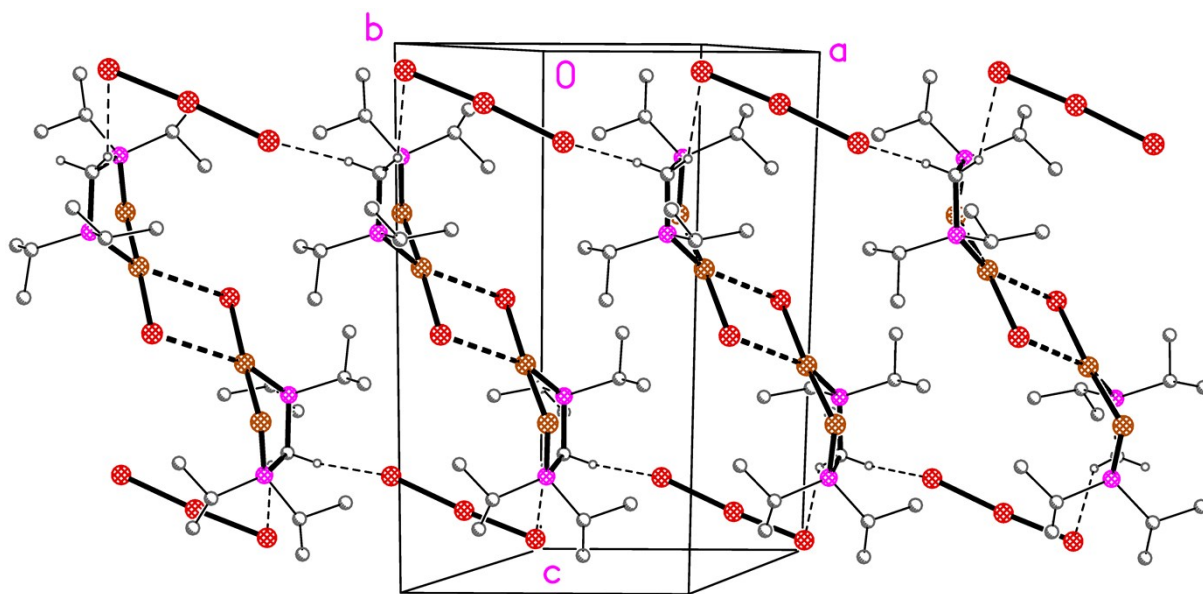

Fig. S5. Packing diagram of compound **10** viewed perpendicular to the *ac* plane. Dashed lines indicate Se–Br contacts (thick) or hydrogen bonds C–H–Br (thin).

Compound **11** forms a cation chain structure parallel to  $[101]$ , via the contacts Se1–Br2( $-x, -y, -z$ ) 3.3866(7) and Br1–Br3( $-x, -y, 1-z$ ) 3.6910(9) Å (Fig. S6). The bromide anions Br4 are not involved in such contacts. The further, borderline, contacts Br1–Br1( $-x, -y, -z$ ) 3.9607(13), Br2–Br3( $x, y, -1+z$ ) 3.9024(8) and Br2–Br2( $-x, -y, -z$ ) 3.9758(10) Å (the latter across the Se<sub>2</sub>Br<sub>2</sub> rhombuses) are not included in the Figure.

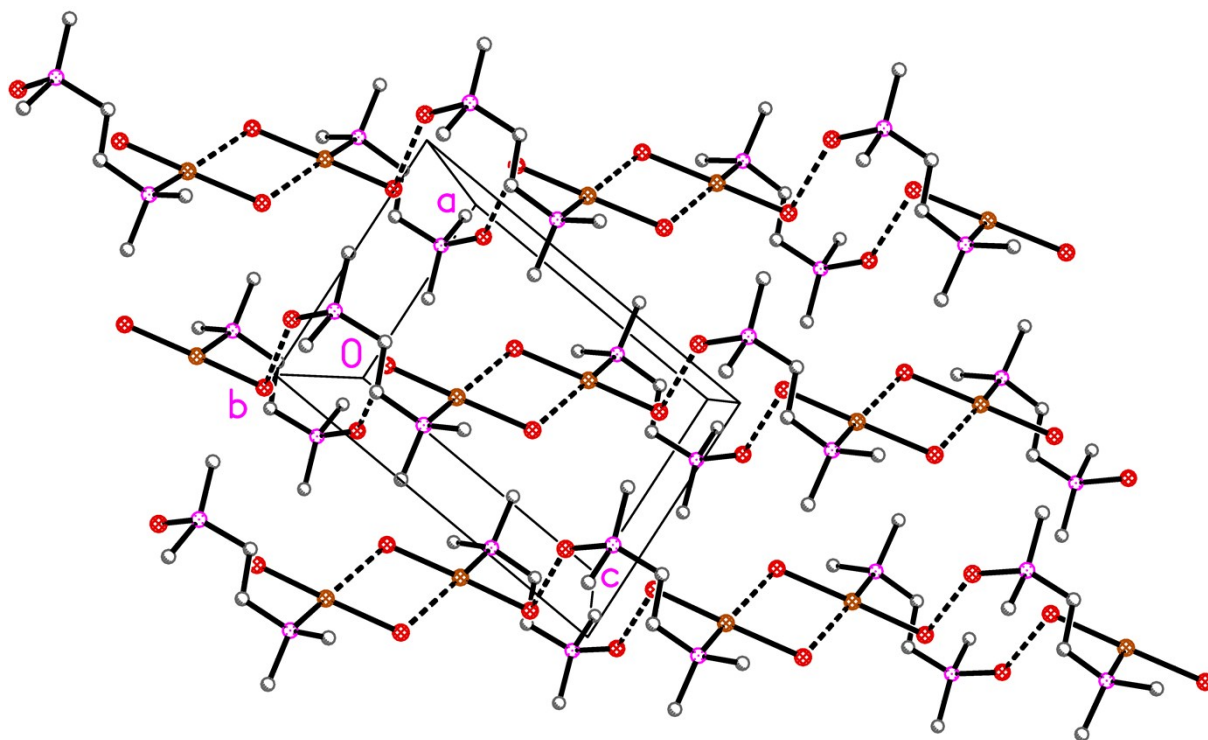

Fig. S6. Packing diagram of compound **11** viewed perpendicular to the *ac* plane. Short Br–Br and Se–Br contacts are indicated by dashed lines. Methyl carbons are omitted for clarity.

Compound **12** forms a layer structure parallel to the *ab* plane, whereby the contacts Br1–Br3 3.8630(4), Br1–Br3( $-x, -y, 1-z$ ) 3.8565(5) and Br3–Br3( $-x, -y, 1-z$ ) 3.7360(6) Å combine to form Br<sub>4</sub> rhombuses (Fig. S7).

Compound **13** is a dichloromethane solvate; the dichloromethane is well-ordered and forms chains of molecules parallel to the *a* axis with Cl98–Cl98 ( $1-x, 1-y, 2-z$ ) 3.492(2) and Cl99–Cl99 ( $-x, 1-y, 2-z$ ) 3.457(2) Å (Fig. S8).

For compound **14**, an S1–S1 contact of 3.686(2) Å via the twofold axis ( $-x, y, \frac{1}{2}-z$ ) connects the cations in pairs. For compound **15**, apart from the two Br–Br contracts within the asymmetric unit, a short S1–Br1 contact of 3.4215(6) Å links the cations via **b** translation (Fig. S9).

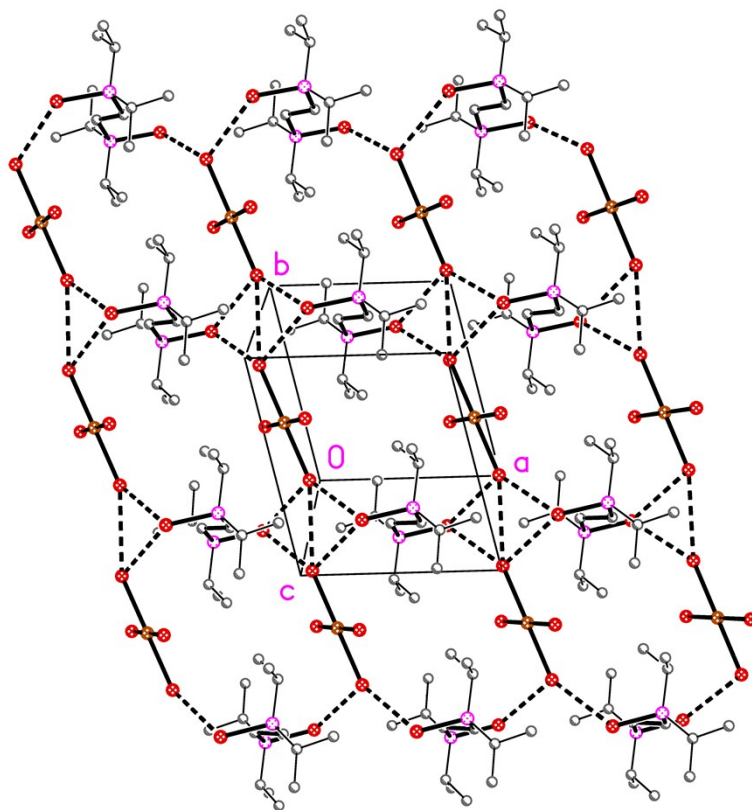

Fig. S7. Packing diagram of compound **12** viewed perpendicular to the *ab* plane. Short Br-Br contacts are indicated by dashed lines.

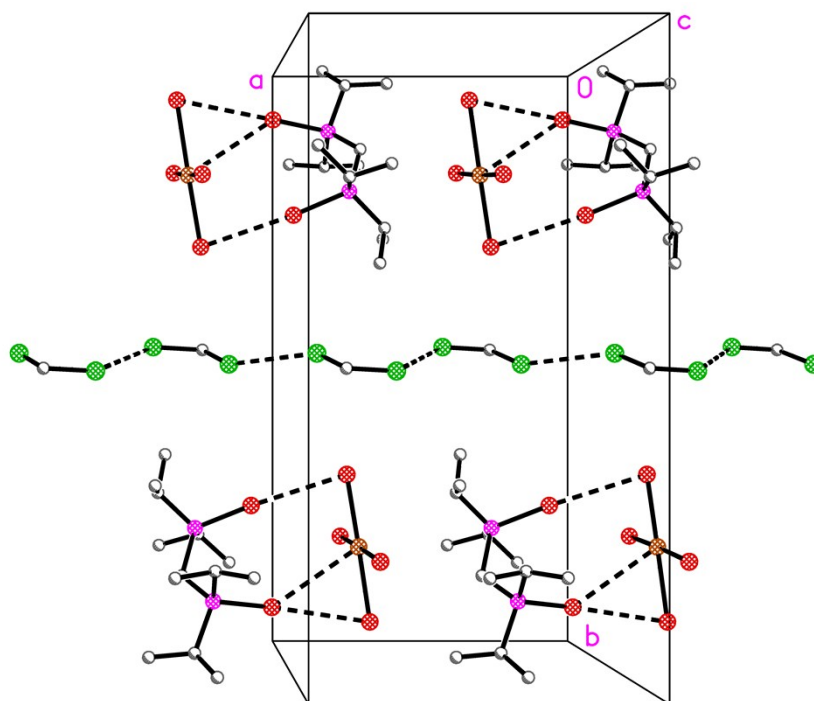

Fig. S8. Packing diagram of compound **13** viewed perpendicular to the *ab* plane at  $z \approx 0$ . Short contacts are indicated by dashed lines.

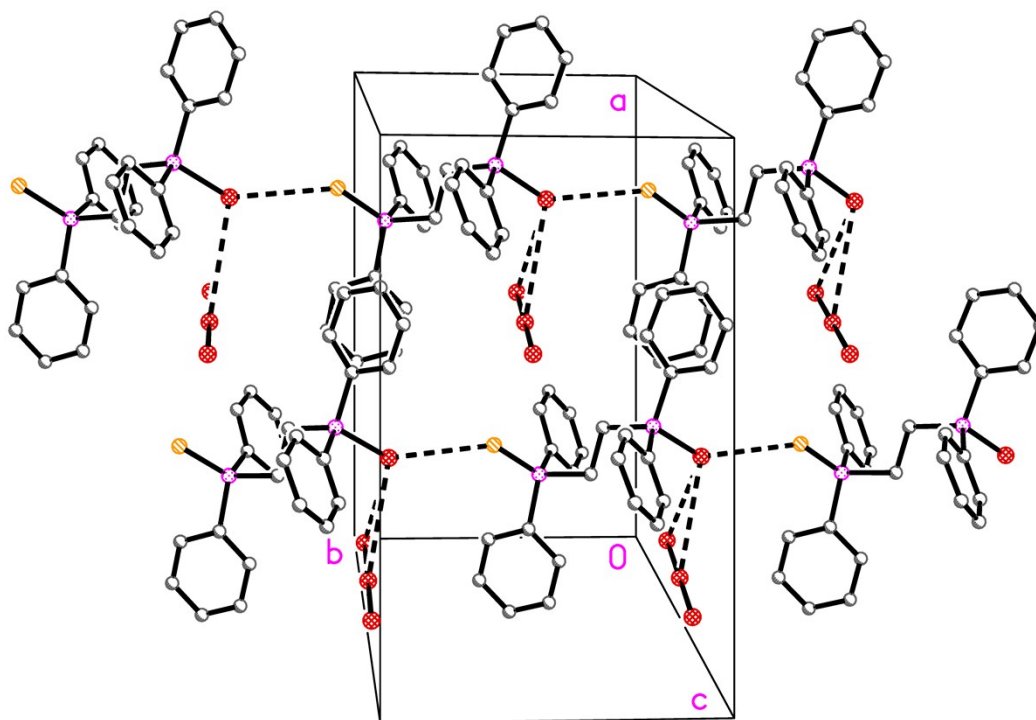

Fig. S9. Packing diagram of compound **15** viewed (approximately) perpendicular to the *ab* plane. Short Br...Br contacts are indicated by dashed lines.



## 2. X-Ray structure determinations of the oxygen-containing by-products 16–19.

Halogen derivatives of phosphine chalcogenides are (in)famous for their sensitivity to moisture and the related tendency to form hydrolysis products containing P=O and P—OH groups.<sup>[1-4]</sup>

The structures were determined as described in the main paper; data for compound **19** were measured using Cu  $K\alpha$  radiation.

CCDC 1496346-1496349 contain the supplementary crystallographic data for compounds **16-19** (in the same order). These data can be obtained free of charge from the Cambridge Crystallographic Data Centre via <http://www.ccdc.cam.ac.uk/>.

### Structure of compound **16**, [d<sup>i</sup>prpm(O)(OH)<sup>+</sup>]<sub>2</sub> [Se<sub>2</sub>Br<sub>6</sub>]<sup>2-</sup>

Crystal data for **16**: C<sub>26</sub>H<sub>62</sub>Br<sub>6</sub>O<sub>4</sub>P<sub>4</sub>Se<sub>2</sub>,  $M = 1200.02$ , triclinic,  $a = 10.2092(4)$ ,  $b = 13.8414(5)$ ,  $c = 16.6253(6)$  Å,  $\alpha = 81.773(4)$ ,  $\beta = 73.151(4)$ ,  $\gamma = 73.308(4)^\circ$ ,  $V = 2149.10$  Å<sup>3</sup>, space group  $P\bar{1}$ ,  $Z = 2$ , 163196 reflections measured, 12992 independent ( $R_{int} = 0.052$ ). Final  $R(F)$  0.0270 ( $I > 2\sigma(I)$ ); final  $wR(F^2)$  0.0518 (all data). See Fig. S10.

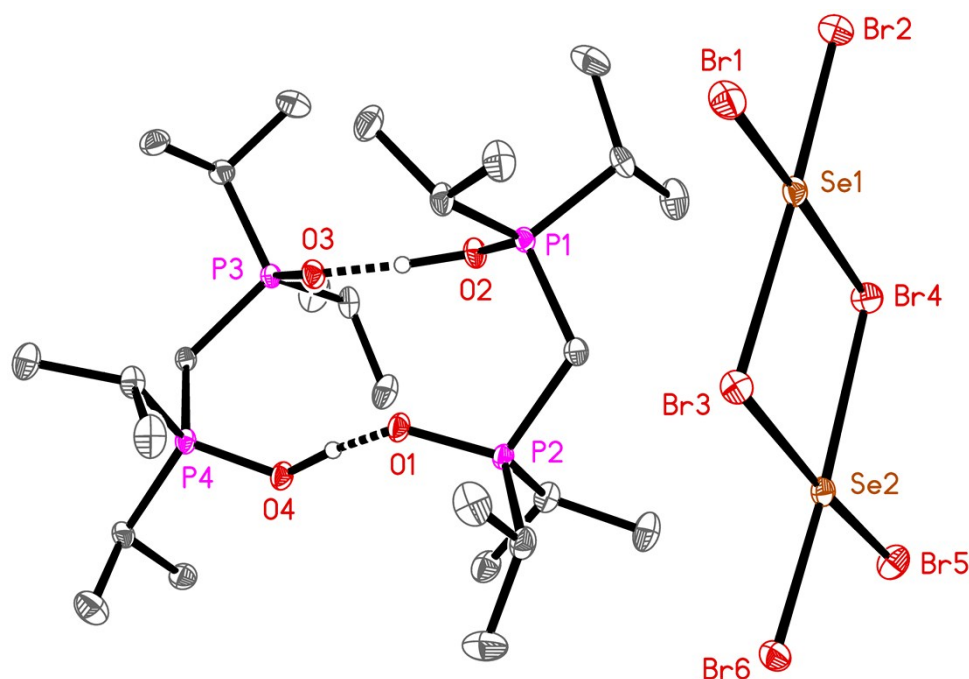

Fig. S10. Structure of compound **16** in the crystal; ellipsoids correspond to 50% probability levels. Dashed lines indicate hydrogen bonds. Only one position of the disordered isopropyl group is shown. Hydrogen atoms (except OH) are omitted. Selected bond lengths (Å): Br1-Se1 2.4275(3), Br2-Se1 2.4590(3), Br3-Se1 2.7719(3), Br3-Se2 2.8497(3), Br4-Se1 2.8221(3), Br4-Se2 2.8549(3), Br5-Se2 2.4169(3), Br6-Se2 2.4087(3). Contact distances (Å): O2□O3 2.422(2), O4□O1 2.418(2).

One isopropyl group is disordered over two positions. The OH hydrogens have slightly high  $U$  values and somewhat long OH bond lengths and might be slightly disordered. It is often difficult to distinguish between ordered unsymmetrical  $\text{POH}\square\text{O}=\text{P}$  and symmetrical  $\text{PO}\square\text{H}\square\text{OP}$  hydrogen bond systems (or a disordered mixture of both) using X-ray methods.

### Structure of compound 17, $[\text{d}^i\text{prpm}(\text{O})(\text{OH})^+]_2 [\text{Se}_2\text{Br}_4]^{2-}$

Crystal data for **17**:  $\text{C}_{26}\text{H}_{62}\text{Br}_4\text{O}_4\text{P}_4\text{Se}_2$ ,  $M = 1040.20$ , monoclinic,  $a = 29.346(2)$ ,  $b = 13.8633(5)$ ,  $c = 20.2475(8)$  Å,  $\beta = 99.575(4)^\circ$ ,  $V = 8122.5$  Å<sup>3</sup>, space group  $C2/c$ ,  $Z = 8$ , 104958 reflections measured, 11785 independent ( $R_{\text{int}} = 0.068$ ). Final  $R(F)$  0.0353 ( $I > 2\sigma(I)$ ), final  $wR(F^2)$  0.0698 (all data). See Fig. S11.

Two isopropyl groups are disordered over two positions. As for **16**, there is some uncertainty as to the exact positions of the OH hydrogens, but the short contacts  $\text{O2}\square\text{O3}$  2.411(3),  $\text{O1}\square\text{O1}$  2.418(3) (over a twofold axis) and  $\text{O4}\square\text{O4}$  2.423(3) Å (over an inversion centre) clearly indicate strong classical hydrogen bonding. The cationic part of the structure is an undulating hydrogen-bonded chain polymer with overall direction parallel to  $[101]$  (Fig. S12), in contrast to the isolated cation pairs in **16**.

Perhaps the most interesting feature are the  $[\text{Se}_2\text{Br}_4]^{2-}$  anions, formally involving  $\text{Se}^{\text{I}}$ ; these had not been previously observed by X-ray diffraction, although there is one structure containing the corresponding  $[\text{Se}_2\text{Cl}_4]^{2-}$  anion.<sup>[5]</sup> There is a marked disparity between the bond lengths  $\text{Se1-Br2}$ ,  $\text{Se2-Br3}$  (ca. 2.5 Å) and  $\text{Se1-Br1}$ ,  $\text{Se2-Br4}$  (ca. 2.75 Å). The two  $\text{SeBr}_2$  groups subtend an interplanar angle of  $88.59(3)^\circ$ , although the planes are poorly defined for almost linear moieties.

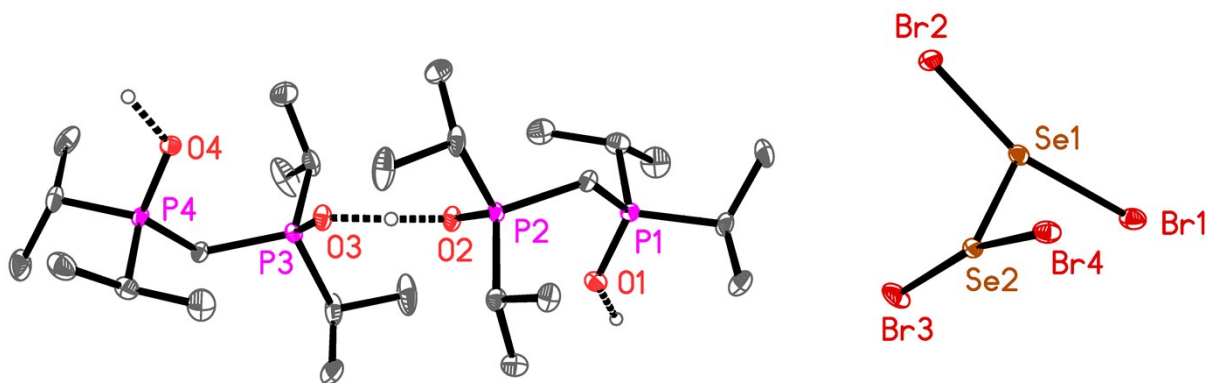

Fig. S11. Structure of the asymmetric unit of compound **17** in the crystal; ellipsoids correspond to 50% probability levels. Dashed lines indicate hydrogen bonds. Only one position of the disordered isopropyl groups is shown. Hydrogen atoms (except OH) are omitted. Selected bond lengths (Å) and angles ( $^\circ$ ):  $\text{Se1-Se2}$  2.2793(4),  $\text{Br1-Se1}$  2.7726(4),  $\text{Br2-Se1}$  2.5029(4),  $\text{Br3-Se2}$  2.5276(4),  $\text{Br4-Se2}$  2.7447(4);  $\text{Br1-Se1-Br2}$  159.406(14),  $\text{Br3-Se2-Br4}$  161.319(14).

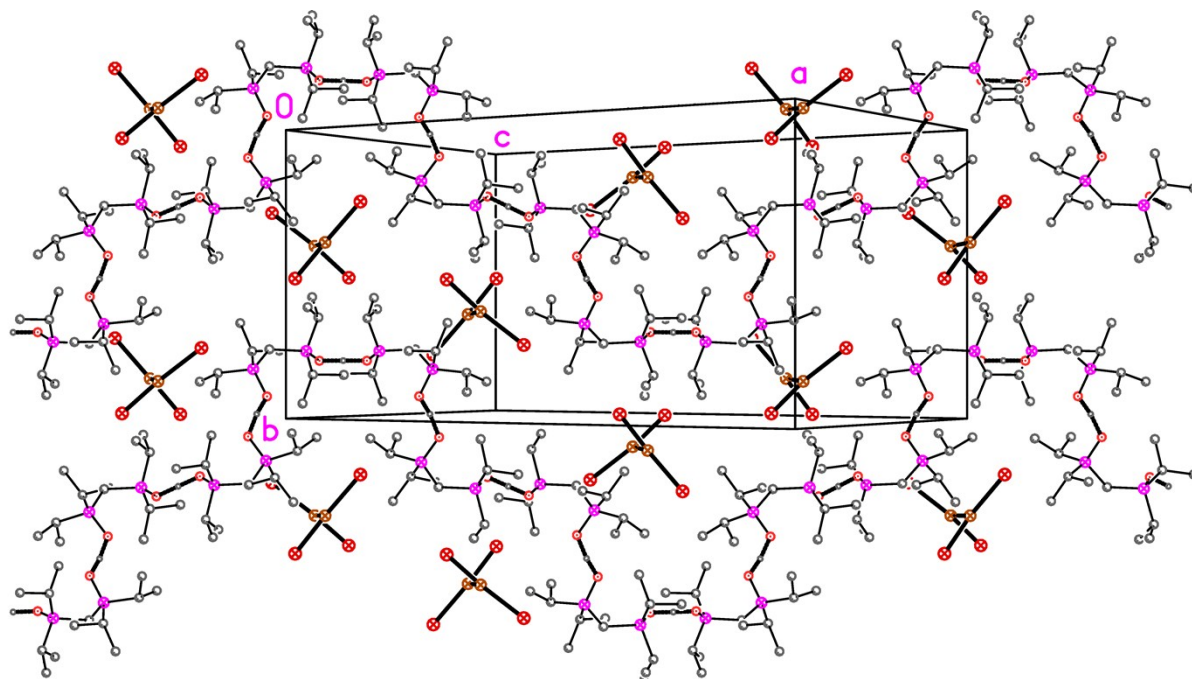

Fig. S12. Packing diagram of compound **17**. Only one position of the disordered isopropyl groups is shown. Hydrogen atoms (except OH) are omitted. The view direction is perpendicular to  $(10\bar{1})$ . Note the undulating chains of hydrogen-bonded cations.

### Structure of compound **18**, $[\text{dppm}(\text{O})(\text{OH})^+]_2 [\text{Se}_3\text{Br}_8]^{2-}$

Crystal data for **18**:  $\text{C}_{50}\text{H}_{46}\text{Br}_8\text{O}_4\text{P}_4\text{Se}_3$ ,  $M = 1710.91$ , triclinic,  $a = 10.4803(5)$ ,  $b = 11.8359(8)$ ,  $c = 12.1607(6)$  Å,  $\alpha = 68.775(6)$ ,  $\beta = 85.723(4)$ ,  $\gamma = 86.800(5)^\circ$ ,  $V = 1401.54$  Å<sup>3</sup>, space group  $P\bar{1}$ ,  $Z = 1$ , 68560 reflections measured, 6684 independent ( $R_{\text{int}} = 0.082$ ). Final  $R(F)$  0.0420 ( $I > 2\sigma(I)$ ), final  $wR(F^2)$  0.0907 (all data). See Fig. S13.

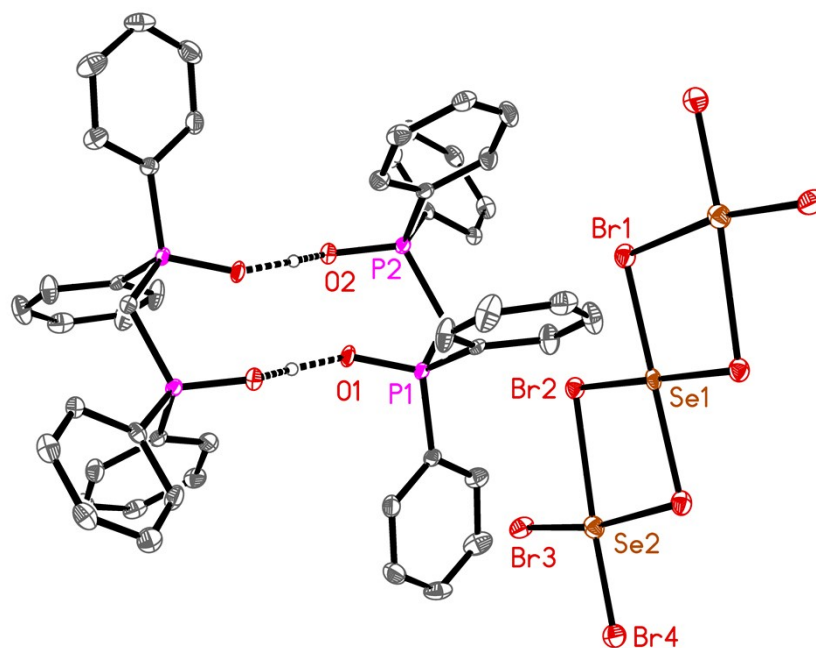

Fig. S13. Structure of compound **18** in the crystal; ellipsoids correspond to 50% probability levels. Dashed lines indicate hydrogen bonds. Selected bond lengths (Å): Se1-Br2 2.5968(5), Se1-Br1 2.5996(5), Br2-Se2 3.0323(7), Se2-Br4 2.3588(7), Se2-Br3 2.3841(7), Se2-Br1#1 2.9090(7). Symmetry operator #1:  $1-x, 1-y, 1-z$ .

Again, there is some uncertainty as to the exact position of the OH hydrogen, but the short contact O1□O1 2.438(4) Å (over an inversion centre) corresponds to a strong classical hydrogen bond. The [Se<sub>3</sub>Br<sub>8</sub>]<sup>2-</sup> anion possesses crystallographic inversion symmetry; the bonds from Se2 to the bridging bromines are very long, and the ion might almost be considered as [SeBr<sub>4</sub>]<sup>2-</sup> with loose contacts to two SeBr<sub>2</sub> molecules. The corresponding angle at Se2 is very acute at 77.975(18)°. The SeBr<sub>4</sub> planes at Se1 and Se2 subtend an angle of 4.96(2)°. In the other known structure of this anion,<sup>[6]</sup> the interplanar angle is much larger at 20.7°.

### Structure of compound **19**, [dppm(O)(OH)<sup>+</sup>]<sub>2</sub> [Se<sub>2</sub>Br<sub>6</sub>]<sup>2-</sup>

Crystal data for **19**: C<sub>50</sub>H<sub>46</sub>Br<sub>6</sub>O<sub>4</sub>P<sub>4</sub>Se<sub>2</sub>, *M* = 1472.13, monoclinic, *a* = 13.0635(3), *b* = 9.5315(2), *c* = 20.8476(5) Å, β = 90.676(2)°, *V* = 2595.65 Å<sup>3</sup>, space group *P*2<sub>1</sub>/*n*, *Z* = 2, 51628 reflections measured, 5421 independent (*R*<sub>int</sub> = 0.068). Final *R*(*F*) 0.0263 (*I* > 2σ(*I*)), final *wR*(*F*<sup>2</sup>) 0.0617 (all data). See Fig. S14.

Again the position of the OH hydrogen is ambiguous, and there is a peak of 2 e Å<sup>-3</sup> near the CH<sub>2</sub> group that may correspond to an unidentified disorder or twinning component. The O1□O2 hydrogen bonding distance is 2.409(3) Å across an inversion centre.

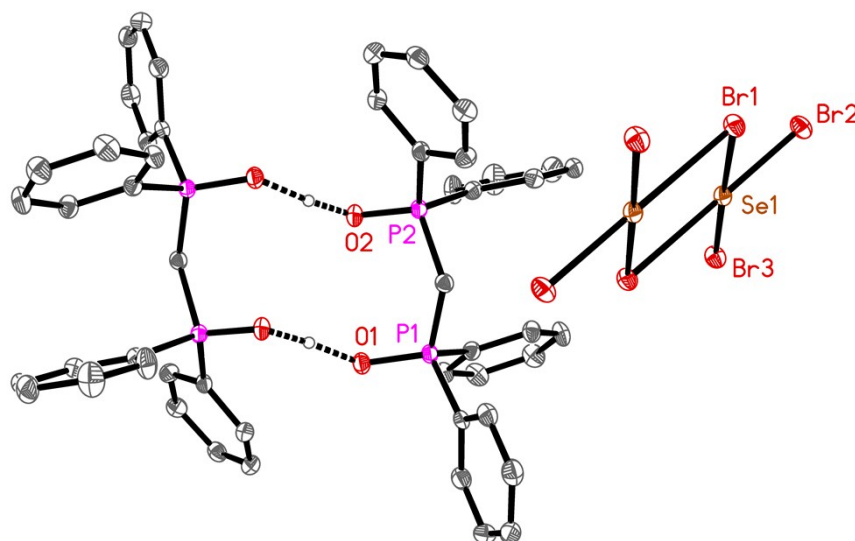

Fig. S14. Structure of compound **19** in the crystal; ellipsoids correspond to 50% probability levels. Dashed lines indicate hydrogen bonds. Selected bond lengths (Å): Se1-Br2 2.4099(4), Se1-Br3 2.4612(4), Se1-Br1 2.7600(4), Br1-Se1#1 2.9176(4). Symmetry operator #1: 1-*x*, 1-*y*, 1-*z*.

### 3. Four X-ray structures of diphosphane diselenides 20–23.

Bis(diphenylphosphano)ethane diselenide has already been the subject of three X-ray structure determinations. The solvent-free compound crystallizes in  $P\bar{1}$  with  $Z = 2$  (two independent molecules, each displaying crystallographic inversion symmetry) [7] or in  $C2/c$  with  $Z = 4$  (one molecule with crystallographic twofold symmetry). [8] The *p*-xylene  $\frac{1}{3}$ -solvate crystallizes in  $P\bar{1}$  with  $Z = 3$  (one dppeSe<sub>2</sub> on a general position and one with inversion symmetry). [9] By chance we have discovered two further forms during studies of metal complexes of dppeSe<sub>2</sub>; one solvent-free in  $P2_1/n$  (**20**) and the dichloromethane solvate (also  $P2_1/n$ , **21**), which we briefly present here. We also present the structures of bis(diisopropylphosphano)methane diselenide (**22**) and bis(diisopropylphosphano)ethane diselenide (**23**).

The structures were determined as in the main paper. CCDC 1579323-1579326 contain the supplementary crystallographic data for compounds **20-23** (in the same order). These data can be obtained free of charge from the Cambridge Crystallographic Data Centre via <http://www.ccdc.cam.ac.uk/>.

#### Synthesis of d<sup>i</sup>prpmSe<sub>2</sub>

To a solution of d<sup>i</sup>prpm (0.874 g, 3.5 mmol) in toluene (20 mL) an excess of elemental selenium was added and the suspension was refluxed for 3 h. The remaining selenium was filtered off and the toluene removed in vacuum. The remaining solid was dried in vacuum (1.342 g, 94%). Diffusion of *n*-pentane into a dichloromethane solution gave colourless single crystals of **22**. <sup>31</sup>P-NMR (200 MHz, CDCl<sub>3</sub>): δ 57.51 (s, J<sub>P-Se</sub> = 713.2 Hz). **Elemental analysis:** Found: C 38.09, H 7.27. Required for C<sub>13</sub>H<sub>30</sub>I<sub>4</sub>P<sub>2</sub>Se<sub>2</sub>: C 38.44, H 7.44 %.

#### Synthesis of d<sup>i</sup>prpeSe<sub>2</sub>

To a solution of d<sup>i</sup>prpe (0.731 g, 2.8 mmol) in toluene (20 mL) an excess of elemental selenium was added and the suspension was refluxed for 3 h. The remaining selenium was filtered off and the toluene removed in vacuum. The remaining solid was dried in vacuum (1.023 g, 87%). Diffusion of *n*-pentane into a dichloromethane solution gave colourless single crystals of **23**. <sup>31</sup>P-NMR (200 MHz, CDCl<sub>3</sub>): δ 65.87 (s, J<sub>P-Se</sub> = 702.4 Hz). **Elemental analysis:** Found: C 39.79, H 7.53. Required for C<sub>13</sub>H<sub>30</sub>I<sub>4</sub>P<sub>2</sub>Se<sub>2</sub>: C 40.01, H 7.67 %.

### Structure of a third polymorph of dppeSe<sub>2</sub> (**20**)

Crystal data for **20**: C<sub>26</sub>H<sub>24</sub>P<sub>2</sub>Se<sub>2</sub>,  $M = 556.31$ , monoclinic,  $a = 9.5936(2)$ ,  $b = 16.1956(3)$ ,  $c = 15.7995(3)$  Å,  $\beta = 103.381(2)^\circ$ ,  $V = 2388.21$  Å<sup>3</sup>, space group  $P2_1/n$ ,  $Z = 4$ , 151754 reflections measured, 6977 independent ( $R_{int} = 0.050$ ). Final  $R(F)$  0.0264 ( $I > 2\sigma(I)$ ), final  $wR(F^2)$  0.0580 (all data). See Fig. S15.

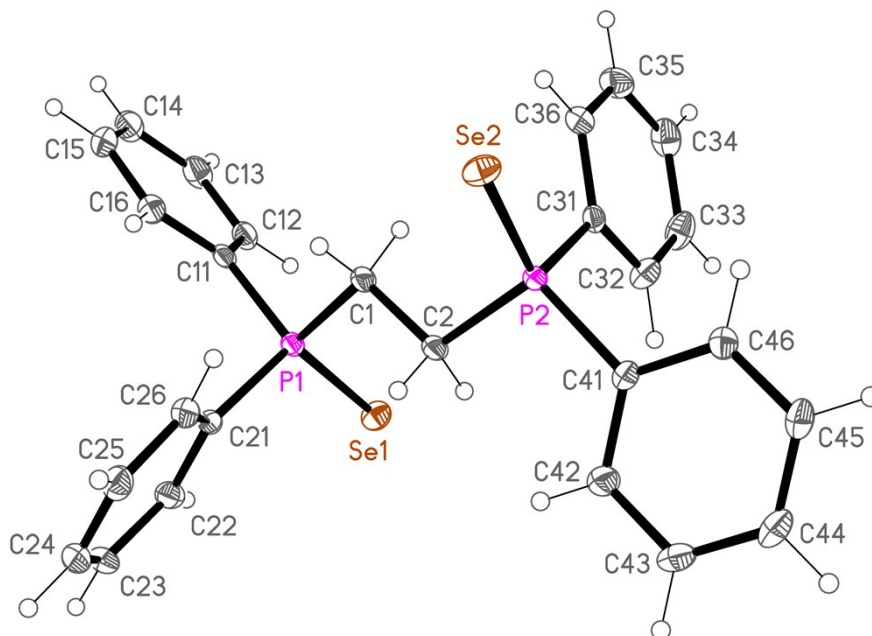

Fig. S15. Structure of compound **20** in the crystal; ellipsoids correspond to 50% probability levels. Selected bond lengths (Å): P1-Se1 2.1047(4), P2-Se2 2.1082(4).

The conformation of the backbone is described by the torsion angles Se1–P1–C1–C2  $-54.54(12)$ , P1–C1–C2–P2  $165.52(8)$ , Se2–P2–C2–C1  $59.54(12)^\circ$ .

### Structure of dppeSe<sub>2</sub> dichloromethane solvate (**21**)

Crystal data for **21**: C<sub>26</sub>H<sub>24</sub>P<sub>2</sub>Se<sub>2</sub>·CH<sub>2</sub>Cl<sub>2</sub>,  $M = 641.24$ , monoclinic,  $a = 12.1314(4)$ ,  $b = 16.1003(3)$ ,  $c = 14.9640(5)$  Å,  $\beta = 111.591(4)^\circ$ ,  $V = 2717.67$  Å<sup>3</sup>, space group  $P2_1/n$ ,  $Z = 4$ , 105404 reflections measured, 7312 independent ( $R_{int} = 0.050$ ). Final  $R(F)$  0.0332 ( $I > 2\sigma(I)$ ), final  $wR(F^2)$  0.0800 (all data). See Fig. S16.

Both dppeSe<sub>2</sub> molecules lie across inversion centres. The torsion angles P–C–C–P are therefore  $180^\circ$  by symmetry. The conformations are further described by the torsion angles Se1–P1–C1–C1'  $-54.8(2)$ , Se2–P2–C2–C2'  $-59.1(2)^\circ$ .

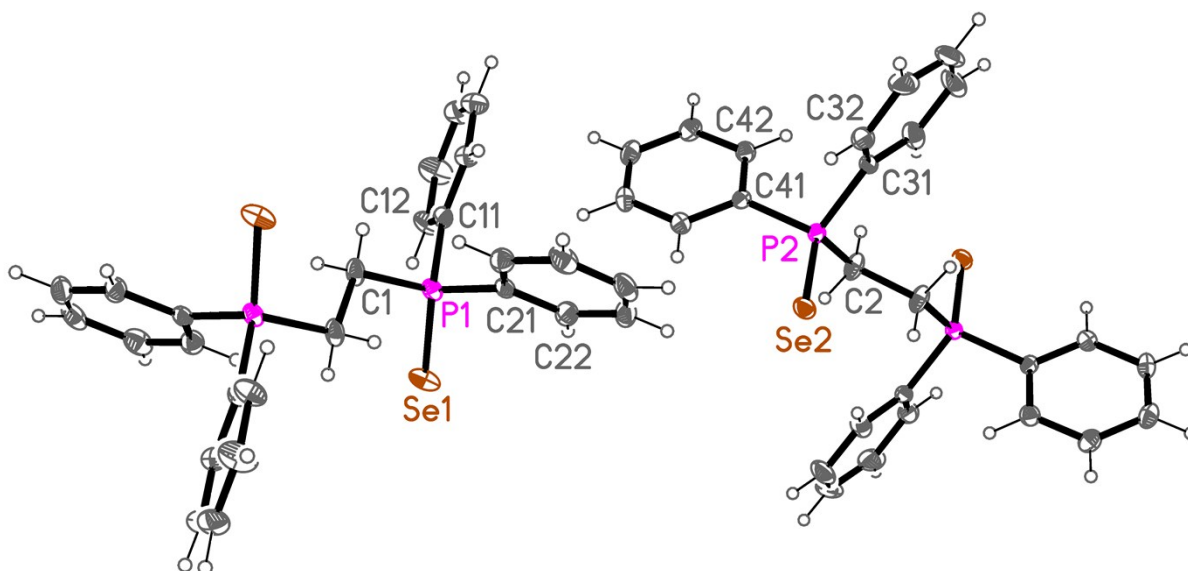

Fig. S16. Structure of compound **21** in the crystal; ellipsoids correspond to 50% probability levels. Only the asymmetric unit is numbered. Selected bond lengths (Å): P1-Se1 2.1185(6), P2-Se2 2.1106(6).

### Structure of d'prpmSe<sub>2</sub> (**22**)

Crystal data for **22**: C<sub>13</sub>H<sub>30</sub>P<sub>2</sub>Se<sub>2</sub>,  $M = 406.23$ , monoclinic,  $a = 13.7347(4)$ ,  $b = 10.4735(3)$ ,  $c = 12.6411(4)$  Å,  $\beta = 100.759(3)^\circ$ ,  $V = 1786.46$  Å<sup>3</sup>, space group  $P2_1/c$ ,  $Z = 4$ , 119830 reflections measured, 5210 independent ( $R_{int} = 0.052$ ). Final  $R(F)$  0.0250 ( $I > 2\sigma(I)$ ), final  $wR(F^2)$  0.0534 (all data). See Fig. S17.

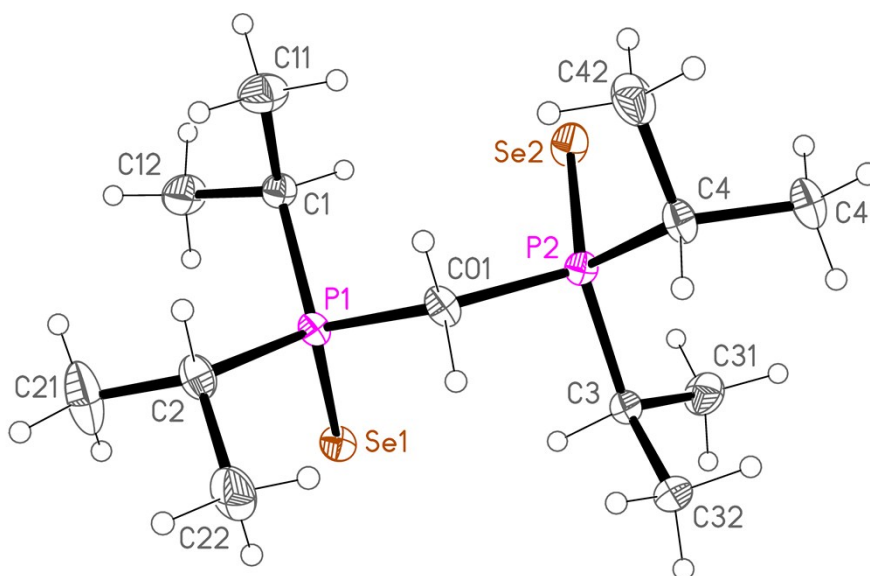

Fig. S17. Structure of compound **22** in the crystal; ellipsoids correspond to 50% probability levels. Only the major position (87%) of the disordered *i*-propyl group (C3, C31, C32) is shown. Selected bond lengths (Å): P1-Se1 2.1111(4), P2-Se2 2.1099(4).

The molecule lies on a general position. The conformation is described by the torsion angles Se1-P1-C01-P2 54.73(12) and Se2-P2-C01-P1 47.04(13)°. The short intramolecular

contacts H1□Se2 and H3□Se1 (both 2.79 Å) may be a factor in determining the conformation. The P–C–P angle is unusually wide (for an  $sp^3$  carbon) at 122.48(9)°.

### Structure of d'prpeSe<sub>2</sub> (**23**)

Crystal data for **23**: C<sub>14</sub>H<sub>32</sub>P<sub>2</sub>Se<sub>2</sub>,  $M = 420.26$ , monoclinic,  $a = 9.3133(5)$ ,  $b = 10.4104(4)$ ,  $c = 10.1508(4)$  Å,  $\beta = 104.577(4)^\circ$ ,  $V = 952.49$  Å<sup>3</sup>, space group  $P2_1/n$ ,  $Z = 2$ , 24692 reflections measured, 2767 independent ( $R_{int} = 0.042$ ). Final  $R(F)$  0.0309 ( $I > 2\sigma(I)$ ), final  $wR(F^2)$  0.0643 (all data). See Fig. S18.

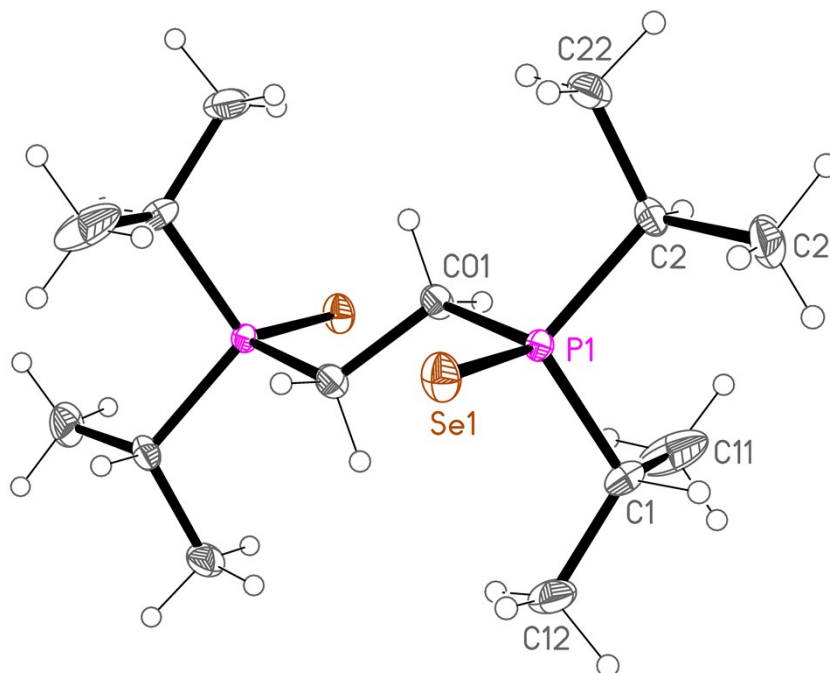

Fig. S18. Structure of compound **23** in the crystal; ellipsoids correspond to 30% probability levels. Only the asymmetric unit is numbered. Selected bond length (Å): P1–Se1 2.1150(5).

The molecule lies across an inversion centre. The torsion angle P–C–C–P is therefore 180° by symmetry. The conformation is further described by the torsion angle Se1–P1–C01–C01' –50.7(2)°.

We are grateful to Mr. Ingo Krause for helping with the synthesis and structure determination of **23** as part of a student project.



## References

- [1] see e.g. C. Taouss, P. G. Jones, *Z. Naturforsch.*, **2016**, 71b, 249–265.
- [2] J. Konu, T. Chivers, *Dalton Trans.* **2008**, 3941–3946.
- [3] F. Ruthe, P. G. Jones, W.-W. du Mont, P. Deplano, M. L. Mercuri, *Z. Anorg. Allg. Chem.* **2000**, 626, 1105–1111.
- [4] A. A. Boraie, W.-W. du Mont, F. Ruthe, P. G. Jones, *Acta Cryst.* **2002**, C53, o318–o320.
- [5] P. D. Boyle, S. M. Godfrey, R. G. Pritchard, *J. Chem. Soc., Dalton Trans.*, **1999**, 4245–4250.
- [6] I. Beckmann, M. Läge, B. Krebs, *Z. anorg. Allg. Chem.*, **2008**, 634, 2518–2526.
- [7] M. Risto, E. M. Jahr, R. Oilunkaniemi, R. S. Laitinen, *Acta Cryst.* **2007**, E63, o4169.
- [8] A. Nemati Kharat, M. Ahmadian, G. Bakhoda, A. Abbasi, *Acta Cryst.* **2008**, E64, o2246.
- [9] D. H. Brown, R. J. Cross, P. R. Mallison, D. D. MacNicol, *J. Chem. Soc., Dalton Trans.* **1980**, 993–998.
